# Supplementary material for: The CD27L and CTP1L Endolysins Targeting Clostridia Contain a Built-in Trigger and Release Factor
Source: PubMed Central journal article supplement (PMC4110038; doi:10.1371/journal.ppat.1004228), 2014-07-24

**Figure S1: Circular dichroism measurements on CD27L/CTP1L wild-type and mutant proteins to show integrity of secondary structure**

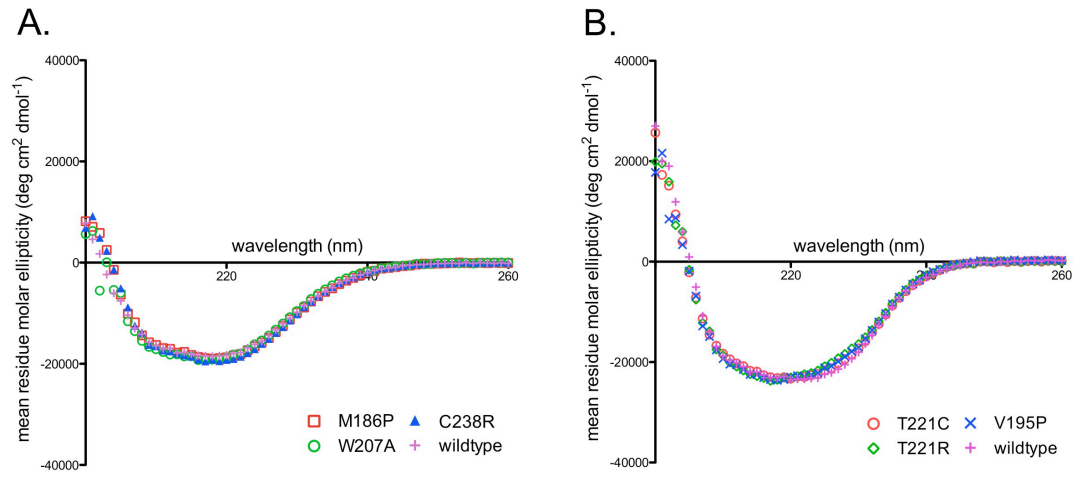

Supplement: ppat.1004228.s001.pdf [file ppat.1004228.s001.pdf]
